# Supplementary material for: The essential role of Dnmt1 in gametogenesis in the large milkweed bug Oncopeltus fasciatus
Source: eLife. 2021 Apr 12;10:e62202. doi: 10.7554/eLife.62202 (PMC8064748; doi:10.7554/eLife.62202)
Supplement: Figure 2—figure supplement 1—source data 1. [file elife-62202-fig2-figsupp1-data1.xlsx]

## Sheet: Sheet1
Name	Tissue	Sex	Primer	Cp	Avg Cp	Std Dev	DCT	-DCT	Gene Expression
ovary #109	ovary	female	Of_DMNT1_rt5	23.29	23.4133	0.120139	2.84	-2.84	6.00867
ovary #110	ovary	female	Of_DMNT1_rt5	23.15	23.17	0.043589	2.62667	-2.62667	6.222
ovary #106	ovary	female	Of_DMNT1_rt5	23.1	23.0933	0.0057735	2.46	-2.46	6.38867
ovary #105	ovary	female	Of_DMNT1_rt5	23.62	23.6067	0.023094	2.43667	-2.43667	6.412
ovary #107	ovary	female	Of_DMNT1_rt5	23.62	23.6233	0.0057735	2.43667	-2.43667	6.412
ovary #108	ovary	female	Of_DMNT1_rt5	22.21	22.23	0.034641	2.22	-2.22	6.62867
ovary #103	ovary	female	Of_DMNT1_rt5	21.95	21.93	0.02	1.82667	-1.82667	7.022
ovary #104	ovary	female	Of_DMNT1_rt5	22.1	22.1567	0.051316	1.24	-1.24	7.60867
gut #76	gut	male	Of_DMNT1_rt5	28.52	28.51	0.0655744	7.56667	-7.56667	1.282
gut #72	gut	male	Of_DMNT1_rt5	27.81	27.8367	0.0737111	7.26667	-7.26667	1.582
gut #79	gut	male	Of_DMNT1_rt5	28.07	28.07	4.35117e-15	7.24667	-7.24667	1.602
gut #73	gut	male	Of_DMNT1_rt5	28.14	28.1133	0.0378594	7.12	-7.12	1.72867
gut #74	gut	male	Of_DMNT1_rt5	27.72	27.77	0.141774	7.1	-7.1	1.74867
gut #75	gut	male	Of_DMNT1_rt5	27.84	27.9733	0.11547	7.09	-7.09	1.75867
gut #78	gut	male	Of_DMNT1_rt5	27.56	27.62	0.0519615	7.06667	-7.06667	1.782
gut #71	gut	male	Of_DMNT1_rt5	27.96	27.9967	0.100167	6.93333	-6.93333	1.91533
gut #70	gut	male	Of_DMNT1_rt5	27.3	27.3	0.02	6.41667	-6.41667	2.432
gut #77	gut	male	Of_DMNT1_rt5	27.47	27.54	0.06245	6.13333	-6.13333	2.71533
head #84	head	male	Of_DMNT1_rt5	29.7	29.84	0.135277	7.04	-7.04	1.80867
head #83	head	male	Of_DMNT1_rt5	29.64	29.6067	0.085049	6.94	-6.94	1.90867
head #91	head	male	Of_DMNT1_rt5	29.45	29.5233	0.0665833	6.76667	-6.76667	2.082
head #88	head	male	Of_DMNT1_rt5	29.76	29.6233	0.119304	6.63667	-6.63667	2.212
head #85	head	male	Of_DMNT1_rt5	29.26	29.25	0.0754983	6.47	-6.47	2.37867
head #87	head	male	Of_DMNT1_rt5	29.51	29.67	0.144222	6.39	-6.39	2.45867
head #90	head	male	Of_DMNT1_rt5	28.84	28.88	0.0608276	6.31	-6.31	2.53867
head #89	head	male	Of_DMNT1_rt5	29.44	29.5133	0.118462	6.16333	-6.16333	2.68533
head #46	head	male	Of_DMNT1_rt5	29.21	29.3667	0.135769	6.14667	-6.14667	2.702
head #86	head	male	Of_DMNT1_rt5	28.92	28.9867	0.124231	5.82333	-5.82333	3.02533
muscle #63	muscle	male	Of_DMNT1_rt5	28.97	29.03	0.0793725	5.58333	-5.58333	3.26533
muscle #64	muscle	male	Of_DMNT1_rt5	28.89	28.9333	0.0404145	5.52667	-5.52667	3.322
muscle #57	muscle	male	Of_DMNT1_rt5	29.34	29.44	0.105357	5.30667	-5.30667	3.542
muscle #62	muscle	male	Of_DMNT1_rt5	28.97	29.0933	0.172143	5.30333	-5.30333	3.54533
muscle #58	muscle	male	Of_DMNT1_rt5	29.11	29.3433	0.204287	5.16333	-5.16333	3.68533
muscle #65	muscle	male	Of_DMNT1_rt5	28.7	28.74	0.087178	5.08	-5.08	3.76867
muscle #60	muscle	male	Of_DMNT1_rt5	29.56	29.6733	0.0986577	5.05	-5.05	3.79867
muscle #66	muscle	male	Of_DMNT1_rt5	28.57	28.57	0.01	4.86	-4.86	3.98867
muscle #61	muscle	male	Of_DMNT1_rt5	28.79	28.78	0.01	4.83	-4.83	4.01867
testes #55	muscle	male	Of_DMNT1_rt5	27.19	27.22	0.03	4.59667	-4.59667	4.252
testes #56	muscle	male	Of_DMNT1_rt5	26.75	26.7333	0.0152753	4.48667	-4.48667	4.362
muscle #59	muscle	male	Of_DMNT1_rt5	29.22	29.2767	0.191398	4.44333	-4.44333	4.40533
testes #51	testes	male	Of_DMNT1_rt5	27.7	27.6967	0.0152753	5.39667	-5.39667	3.452
testes #54	testes	male	Of_DMNT1_rt5	26.64	26.7033	0.0568624	4.79333	-4.79333	4.05533
testes #52	testes	male	Of_DMNT1_rt5	27.23	27.34	0.11	4.66	-4.66	4.18867
testes #53	testes	male	Of_DMNT1_rt5	26.18	26.1733	0.0503322	4.61333	-4.61333	4.23533
testes #50	testes	male	Of_DMNT1_rt5	26.58	26.5833	0.0057735	4.46333	-4.46333	4.38533
testes #47	testes	male	Of_DMNT1_rt5	26.92	26.87	0.0781025	3.96333	-3.96333	4.88533
testes #48	testes	male	Of_DMNT1_rt5	26.34	26.43	0.0953939	3.84667	-3.84667	5.002
testes #49	testes	male	Of_DMNT1_rt5	26.15	26.1133	0.0321455	3.29	-3.29	5.55867
