# Supplementary material for: The essential role of Dnmt1 in gametogenesis in the large milkweed bug Oncopeltus fasciatus
Source: eLife. 2021 Apr 12;10:e62202. doi: 10.7554/eLife.62202 (PMC8064748; doi:10.7554/eLife.62202)
Supplement: Figure 2—source data 1. [file elife-62202-fig2-data1.xlsx]

## Sheet: DNMT1
Name	Stage	Primer	Cp	Average Cp	Std Dev	DCT	-DCT	Stage	GE	gene expression
AdultMate #99	Adult Mated	Of_DNMT1_rt5	25.94	25.9	0.0458258	4.84667	-4.84667	Mated	-0.951333	0.951333
AdultMate #94	Adult Mated	Of_DNMT1_rt5	26.02	26.08	0.052915	5.15	-5.15	Mated	-0.648	0.648
AdultMate #102	Adult Mated	Of_DNMT1_rt5	26.56	26.5133	0.0404145	5.61667	-5.61667	Mated	-0.181333	0.181333
AdultMate #100	Adult Mated	Of_DNMT1_rt5	26.28	26.24	0.10583	5.71	-5.71	Mated	-0.088	0.088
AdultMate #97	Adult Mated	Of_DNMT1_rt5	26.01	25.9833	0.046188	6.03	-6.03	Mated	0.232	-0.232
AdultMate #93	Adult Mated	Of_DNMT1_rt5	25.89	25.91	0.072111	6.03333	-6.03333	Mated	0.235333	-0.235333
AdultMate #101	Adult Mated	Of_DNMT1_rt5	26.52	26.5233	0.0152753	6.13333	-6.13333	Mated	0.335333	-0.335333
AdultMate #98	Adult Mated	Of_DNMT1_rt5	26.54	26.5567	0.0208167	6.22667	-6.22667	Mated	0.428667	-0.428667
AdultMate #95	Adult Mated	Of_DNMT1_rt5	26.43	26.32	0.105357	6.26333	-6.26333	Mated	0.465333	-0.465333
AdultMate #96	Adult Mated	Of_DNMT1_rt5	26.59	26.55	0.04	6.48333	-6.48333	Mated	0.685333	-0.685333
Adult0 #16	Adult0	Of_DNMT1_rt5	25.92	25.9233	0.0251661	4.50667	-4.50667	newly emerged	-1.29133	1.29133
Adult0 #32	Adult0	Of_DNMT1_rt5	26.19	26.2433	0.0472582	4.59667	-4.59667	newly emerged	-1.20133	1.20133
Adult0 #12	Adult0	Of_DNMT1_rt5	26.13	26.0933	0.197569	4.77333	-4.77333	newly emerged	-1.02467	1.02467
Adult0 #13	Adult0	Of_DNMT1_rt5	26.92	26.8333	0.0757188	4.86	-4.86	newly emerged	-0.938	0.938
Adult0 #10	Adult0	Of_DNMT1_rt5	25.83	25.8733	0.0585947	4.93333	-4.93333	newly emerged	-0.864667	0.864667
Adult0 #31	Adult0	Of_DNMT1_rt5	27.29	27.1967	0.0814453	5.00667	-5.00667	newly emerged	-0.791333	0.791333
Adult0 #14	Adult0	Of_DNMT1_rt5	25.66	25.9367	0.453468	5.21333	-5.21333	newly emerged	-0.584667	0.584667
Adult0 #15	Adult0	Of_DNMT1_rt5	26.63	26.5733	0.0493288	5.33	-5.33	newly emerged	-0.468	0.468
Adult0 #9	Adult0	Of_DNMT1_rt5	26.32	26.2667	0.0503322	5.90667	-5.90667	newly emerged	0.108667	-0.108667
Adult0 #17	Adult0	Of_DNMT1_rt5	27.01	26.6967	0.595427	5.95	-5.95	newly emerged	0.152	-0.152
Adult0 #11	Adult0	Of_DNMT1_rt5	26.9	26.8067	0.0832666	6.17333	-6.17333	newly emerged	0.375333	-0.375333
Adult0 #18	Adult0	Of_DNMT1_rt5	27.15	27.1167	0.057735	6.41333	-6.41333	newly emerged	0.615333	-0.615333
Adult7-10 #47	Adult7-10	Of_DNMT1_rt5	26.54	26.4433	0.100167	5.40333	-5.40333	Virgin	-0.394667	0.394667
Adult7-10 #55	Adult7-10	Of_DNMT1_rt5	27.2	27.1833	0.16563	5.47667	-5.47667	Virgin	-0.321333	0.321333
Adult7-10 #50	Adult7-10	Of_DNMT1_rt5	26.18	26.1767	0.0057735	5.51	-5.51	Virgin	-0.288	0.288
Adult7-10 #48	Adult7-10	Of_DNMT1_rt5	26.06	26.1067	0.0568624	5.63667	-5.63667	Virgin	-0.161333	0.161333
Adult7-10 #49	Adult7-10	Of_DNMT1_rt5	25.65	25.6333	0.0960902	5.64	-5.64	Virgin	-0.158	0.158
Adult7-10 #53	Adult7-10	Of_DNMT1_rt5	25.79	25.83	0.034641	5.94	-5.94	Virgin	0.142	-0.142
Adult7-10 #56	Adult7-10	Of_DNMT1_rt5	26.76	26.7167	0.0929157	6.02	-6.02	Virgin	0.222	-0.222
Adult7-10 #54	Adult7-10	Of_DNMT1_rt5	25.83	25.8533	0.0321455	6.06	-6.06	Virgin	0.262	-0.262
Adult7-10 #52	Adult7-10	Of_DNMT1_rt5	26.81	26.8133	0.0057735	6.10667	-6.10667	Virgin	0.308667	-0.308667
Adult7-10 #51	Adult7-10	Of_DNMT1_rt5	26.88	26.8767	0.0750555	6.18667	-6.18667	Virgin	0.388667	-0.388667
L4 #3	L4	Of_DNMT1_rt5	24.77	24.7533	0.0472582	3.46667	-3.46667	4th instar	-2.33133	2.33133
L4 #38	L4	Of_DNMT1_rt5	25.31	25.28	0.03	3.67333	-3.67333	4th instar	-2.12467	2.12467
L4 #2	L4	Of_DNMT1_rt5	24.92	24.84	0.069282	3.85667	-3.85667	4th instar	-1.94133	1.94133
L4 #39	L4	Of_DNMT1_rt5	25.25	25.2267	0.0321455	4.00667	-4.00667	4th instar	-1.79133	1.79133
L4 #1	L4	Of_DNMT1_rt5	25.29	25.1967	0.0832666	4.07333	-4.07333	4th instar	-1.72467	1.72467
L4 #33	L4	Of_DNMT1_rt5	24.83	24.83	0	4.24333	-4.24333	4th instar	-1.55467	1.55467
L4 #35	L4	Of_DNMT1_rt5	25.28	25.42	0.131149	4.33667	-4.33667	4th instar	-1.46133	1.46133
L4 #36	L4	Of_DNMT1_rt5	25.25	25.2533	0.0251661	4.47	-4.47	4th instar	-1.328	1.328
L4 #34	L4	Of_DNMT1_rt5	25.24	25.22	0.02	4.5	-4.5	4th instar	-1.298	1.298
L4 #137	L4	Of_DNMT1_rt5	25.22	25.2033	0.0763763	4.62	-4.62	4th instar	-1.178	1.178
L5 #43	L5	Of_DNMT1_rt5	25.95	26.0667	0.10116	3.84667	-3.84667	5th instar	-1.95133	1.95133
L5 #44	L5	Of_DNMT1_rt5	26.1	26.08	0.02	4.28667	-4.28667	5th instar	-1.51133	1.51133
L5 #45	L5	Of_DNMT1_rt5	25.92	25.9267	0.0208167	4.35333	-4.35333	5th instar	-1.44467	1.44467
L5 #5	L5	Of_DNMT1_rt5	25.58	25.5567	0.0680686	4.51	-4.51	5th instar	-1.288	1.288
L5 #7	L5	Of_DNMT1_rt5	25.14	25.0867	0.224796	4.55	-4.55	5th instar	-1.248	1.248
L5 #42	L5	Of_DNMT1_rt5	25.22	25.1533	0.0986577	4.56667	-4.56667	5th instar	-1.23133	1.23133
L5 #41	L5	Of_DNMT1_rt5	25.74	25.77	0.0519615	4.82333	-4.82333	5th instar	-0.974667	0.974667
L5 #40	L5	Of_DNMT1_rt5	25.84	25.84	0.13	4.88667	-4.88667	5th instar	-0.911333	0.911333
L5 #4	L5	Of_DNMT1_rt5	25.85	25.85	0.02	4.88667	-4.88667	5th instar	-0.911333	0.911333
L5 #6	L5	Of_DNMT1_rt5	25.65	25.6267	0.0321455	5.03	-5.03	5th instar	-0.768	0.768

## Sheet: Boule
Name	Stage	Primer	Cp	Avg Cp	Std Dev	DCT	-DCT	gene expression
AdultMate #94	Adult Mated	Of_boule_rt2	21.14	21.08	0.0519615	-0.276667	0.276667	0.610997
AdultMate #99	Adult Mated	Of_boule_rt2	20.81	20.78	0.043589	0.0366667	-0.0366667	0.297663
AdultMate #93	Adult Mated	Of_boule_rt2	20.55	20.5333	0.0665833	0.116667	-0.116667	0.217663
AdultMate #100	Adult Mated	Of_boule_rt2	21.06	21.0733	0.011547	0.22	-0.22	0.11433
AdultMate #96	Adult Mated	Of_boule_rt2	20.9	20.8333	0.0585947	0.26	-0.26	0.07433
AdultMate #101	Adult Mated	Of_boule_rt2	21.27	21.3	0.03	0.36	-0.36	-0.02567
AdultMate #102	Adult Mated	Of_boule_rt2	21.79	21.7033	0.102632	0.423333	-0.423333	-0.0890033
AdultMate #95	Adult Mated	Of_boule_rt2	20.96	20.9067	0.083865	0.44	-0.44	-0.10567
AdultMate #97	Adult Mated	Of_boule_rt2	21.22	21.14	0.113578	0.9	-0.9	-0.56567
AdultMate #98	Adult Mated	Of_boule_rt2	21.72	21.7367	0.0568624	0.966667	-0.966667	-0.632337
Adult0 #31	Adult0	Of_boule_rt2	22.09	21.9567	0.11547	-0.706667	0.706667	1.041
Adult0 #13	Adult0	Of_boule_rt2	22.27	22.0767	0.174738	-0.7	0.7	1.03433
Adult0 #12	Adult0	Of_boule_rt2	21.56	21.4433	0.237557	-0.38	0.38	0.71433
Adult0 #14	Adult0	Of_boule_rt2	20.83	20.8533	0.0251661	-0.35	0.35	0.68433
Adult0 #32	Adult0	Of_boule_rt2	21.73	21.7533	0.0404145	-0.243333	0.243333	0.577663
Adult0 #16	Adult0	Of_boule_rt2	21.67	21.65	0.043589	-0.116667	0.116667	0.450997
Adult0 #15	Adult0	Of_boule_rt2	21.57	21.5867	0.0568624	-0.0766667	0.0766667	0.410997
Adult0 #10	Adult0	Of_boule_rt2	21.45	21.4567	0.110151	0.0533333	-0.0533333	0.280997
Adult0 #17	Adult0	Of_boule_rt2	22.42	21.7333	0.844768	0.136667	-0.136667	0.197663
Adult0 #11	Adult0	Of_boule_rt2	21.45	21.37	0.069282	0.263333	-0.263333	0.0709967
Adult0 #18	Adult0	Of_boule_rt2	21.67	21.71	0.0360555	0.556667	-0.556667	-0.222337
Adult0 #9	Adult0	Of_boule_rt2	21.42	21.44	0.0264575	0.566667	-0.566667	-0.232337
Adult7-10 #47	Adult7-10	Of_boule_rt2	21.05	21.01	0.052915	-0.503333	0.503333	0.837663
Adult7-10 #50	Adult7-10	Of_boule_rt2	20.78	20.83	0.06245	-0.213333	0.213333	0.547663
Adult7-10 #48	Adult7-10	Of_boule_rt2	20.65	20.7433	0.144684	-0.13	0.13	0.46433
Adult7-10 #49	Adult7-10	Of_boule_rt2	20.5	20.4333	0.160728	-0.113333	0.113333	0.447663
Adult7-10 #452	Adult7-10	Of_boule_rt2	21.7	21.76	0.072111	0.473333	-0.473333	-0.139003
Adult7-10 #53	Adult7-10	Of_boule_rt2	20.86	20.7933	0.0702377	0.506667	-0.506667	-0.172337
Adult7-10 #55	Adult7-10	Of_boule_rt2	22.96	22.81	0.173494	0.666667	-0.666667	-0.332337
Adult7-10 #54	Adult7-10	Of_boule_rt2	20.69	20.8067	0.255799	0.67	-0.67	-0.33567
Adult7-10 #56	Adult7-10	Of_boule_rt2	21.89	21.86	0.0519615	0.82	-0.82	-0.48567
Adult7-10 #51	Adult7-10	Of_boule_rt2	22.29	22.2433	0.0404145	1.16667	-1.16667	-0.832337
L4 #3	L4	Of_boule_rt2	20.03	20.04	0.0754983	-1.84333	1.84333	2.17766
L4 #2	L4	Of_boule_rt2	19.9	19.8233	0.070946	-1.79667	1.79667	2.131
L4 #38	L4	Of_boule_rt2	20.5	20.5	0	-1.71667	1.71667	2.051
L4 #1	L4	Of_boule_rt2	20.12	20.19	0.06245	-1.57333	1.57333	1.90766
L4 #33	L4	Of_boule_rt2	19.56	19.5833	0.0208167	-1.36	1.36	1.69433
L4 #35	L4	Of_boule_rt2	20.49	20.4267	0.0650641	-1.22	1.22	1.55433
L4 #39	L4	Of_boule_rt2	20.56	20.6467	0.0776745	-1.18	1.18	1.51433
L4 #34	L4	Of_boule_rt2	20.11	19.9533	0.150444	-1.03	1.03	1.36433
L4 #37	L4	Of_boule_rt2	20.1	20.0633	0.0723418	-0.86	0.86	1.19433
L4 #36	L4	Of_boule_rt2	20.18	20.28	0.0953939	-0.76	0.76	1.09433
L5 #44	L5	Of_boule_rt2	20.8	20.9367	0.126623	-1.11667	1.11667	1.451
L5 #45	L5	Of_boule_rt2	20.96	20.91	0.043589	-1.04	1.04	1.37433
L5 #7	L5	Of_boule_rt2	20.2	20.0367	0.1823	-1.01667	1.01667	1.351
L5 #40	L5	Of_boule_rt2	20.59	20.47	0.131149	-1.01667	1.01667	1.351
L5 #42	L5	Of_boule_rt2	20.13	20.2167	0.0750555	-1.01333	1.01333	1.34766
L5 #4	L5	Of_boule_rt2	20.58	20.6367	0.125033	-1.00333	1.00333	1.33766
L5 #43	L5	Of_boule_rt2	21.76	21.7867	0.0378594	-0.93	0.93	1.26433
L5 #5	L5	Of_boule_rt2	20.89	20.81	0.0984886	-0.87	0.87	1.20433
L5 #41	L5	Of_boule_rt2	20.62	20.6867	0.0650641	-0.66	0.66	0.99433
L5 #6	L5	Of_boule_rt2	20.6	20.5167	0.0737111	-0.606667	0.606667	0.940997

## Sheet: Vasa
Name	Stage	Primer	Cp	Avg Cp	Std Dev	DCT	-DCT	gene expression
AdultMat #102	Adult Mated	Of_vasa_rt3	23.49	23.5267	0.0550757	3.05667	-3.05667	1.08567
AdultMat #99	Adult Mated	Of_vasa_rt3	22.75	22.7733	0.0680686	3.13	-3.13	1.01233
AdultMat #94	Adult Mated	Of_vasa_rt3	23.35	23.44	0.08544	3.26	-3.26	0.882333
AdultMat #100	Adult Mated	Of_vasa_rt3	22.98	23.0167	0.0472582	3.35333	-3.35333	0.789
AdultMat #96	Adult Mated	Of_vasa_rt3	22.73	22.7733	0.0404145	3.36333	-3.36333	0.779
AdultMat #93	Adult Mated	Of_vasa_rt3	22.56	22.59	0.0519615	3.37667	-3.37667	0.765667
AdultMat #98	Adult Mated	Of_vasa_rt3	23.14	23.2367	0.105987	3.60667	-3.60667	0.535667
AdultMat #101	Adult Mated	Of_vasa_rt3	23.44	23.2933	0.140475	3.61	-3.61	0.532333
AdultMat #95	Adult Mated	Of_vasa_rt3	22.95	22.94	0.105357	3.79333	-3.79333	0.349
AdultMat #97	Adult Mated	Of_vasa_rt3	23.05	22.8967	0.178979	3.80333	-3.80333	0.339
Adult0 #32	Adult0	Of_vasa_rt3	23.55	23.5333	0.0208167	2.47333	-2.47333	1.669
Adult0 #31	Adult0	Of_vasa_rt3	24.3	24.2867	0.140475	2.77	-2.77	1.37233
Adult0 #12	Adult0	Of_vasa_rt3	23.61	23.3933	0.243379	2.78333	-2.78333	1.359
Adult0 #16	Adult0	Of_vasa_rt3	23.44	23.3567	0.0763763	2.81667	-2.81667	1.32567
Adult0 #14	Adult0	Of_vasa_rt3	22.84	22.8267	0.051316	2.83667	-2.83667	1.30567
Adult0 #13	Adult0	Of_vasa_rt3	24.08	24.05	0.0264575	2.88667	-2.88667	1.25567
Adult0 #17	Adult0	Of_vasa_rt3	24	23.42	0.629841	3.16667	-3.16667	0.975667
Adult0 #15	Adult0	Of_vasa_rt3	23.74	23.79	0.0556776	3.25667	-3.25667	0.885667
Adult0 #11	Adult0	Of_vasa_rt3	23.2	23.1733	0.0737111	3.31333	-3.31333	0.829
Adult0 #9	Adult0	Of_vasa_rt3	23.11	23	0.101489	3.4	-3.4	0.742333
Adult0 #10	Adult0	Of_vasa_rt3	24.49	24.4833	0.190088	4.28333	-4.28333	-0.141
Adult0 #18	Adult0	Of_vasa_rt3	24.59	24.6267	0.197569	4.7	-4.7	-0.557667
Adult7-10 #49	Adult7-10	Of_vasa_rt3	22.9	22.7767	0.188237	3.28	-3.28	0.862333
Adult7-10 #50	Adult7-10	Of_vasa_rt3	23.31	23.24	0.0754983	3.29333	-3.29333	0.849
Adult7-10 #48	Adult7-10	Of_vasa_rt3	23.01	23.1133	0.123423	3.34	-3.34	0.802333
Adult7-10 #53	Adult7-10	Of_vasa_rt3	22.65	22.6067	0.0750555	3.42333	-3.42333	0.719
Adult7-10 #47	Adult7-10	Of_vasa_rt3	23.58	23.5633	0.0288675	3.47667	-3.47667	0.665667
Adult7-10 #54	Adult7-10	Of_vasa_rt3	23.09	23.0633	0.0251661	3.84	-3.84	0.302333
Adult7-10 #52	Adult7-10	Of_vasa_rt3	24.44	24.4867	0.0404145	4.38	-4.38	-0.237667
Adult7-10 #51	Adult7-10	Of_vasa_rt3	25.27	25.2467	0.0680686	5.24333	-5.24333	-1.101
Adult7-10 #55	Adult7-10	Of_vasa_rt3	26.51	26.2967	0.244404	5.45333	-5.45333	-1.311
Adult7-10 #56	Adult7-10	Of_vasa_rt3	25.5	25.5533	0.0680686	5.69333	-5.69333	-1.551
L4 #2	L4	Of_vasa_rt3	21.53	21.4067	0.142945	1.21333	-1.21333	2.929
L4 #13	L4	Of_vasa_rt3	21.73	21.7867	0.0602771	1.38333	-1.38333	2.759
L4 #1	L4	Of_vasa_rt3	22.01	21.9733	0.0907377	1.63	-1.63	2.51233
L4 #38	L4	Of_vasa_rt3	22.58	22.5867	0.0503322	1.73333	-1.73333	2.409
L4 #36	L4	Of_vasa_rt3	21.77	21.72	0.0707107	1.94	-1.94	2.20233
L4 #39	L4	Of_vasa_rt3	22.35	22.4567	0.10504	1.98667	-1.98667	2.15567
L4 #133	L4	Of_vasa_rt3	21.81	21.83	0.034641	2.12667	-2.12667	2.01567
L4 #35	L4	Of_vasa_rt3		22.63	#DIV/0!	2.21	-2.21	1.93233
L4 #37	L4	Of_vasa_rt3	22.2	22.07	0.13	2.35	-2.35	1.79233
L4 #34	L4	Of_vasa_rt3	27.67	22.535	0.0353553	2.58167	-2.58167	1.56067
L5 #42	L5	Of_vasa_rt3	22.27	22.2733	0.145029	2.36	-2.36	1.78233
L5 #45	L5	Of_vasa_rt3	23.15	23.19	0.04	2.45	-2.45	1.69233
L5 #5	L5	Of_vasa_rt3	22.76	22.94	0.156205	2.64667	-2.64667	1.49567
L5 #41	L5	Of_vasa_rt3	22.78	22.72	0.158745	2.68	-2.68	1.46233
L5 #40	L5	Of_vasa_rt3	22.94	22.86	0.07	2.79	-2.79	1.35233
L5 #7	L5	Of_vasa_rt3	22.67	22.5267	0.214554	2.89333	-2.89333	1.249
L5 #44	L5	Of_vasa_rt3	23.64	23.6667	0.0378594	2.92333	-2.92333	1.219
L5 #43	L5	Of_vasa_rt3	24.52	24.3767	0.126623	2.93	-2.93	1.21233
L5 #6	L5	Of_vasa_rt3	22.79	22.84	0.05	3.07667	-3.07667	1.06567
L5 #4	L5	Of_vasa_rt3	23.65	23.7933	0.162583	3.49667	-3.49667	0.645667
