# Supplementary material for: The essential role of Dnmt1 in gametogenesis in the large milkweed bug Oncopeltus fasciatus
Source: eLife. 2021 Apr 12;10:e62202. doi: 10.7554/eLife.62202 (PMC8064748; doi:10.7554/eLife.62202)
Supplement: Figure 3—source data 1. [file elife-62202-fig3-data1.xlsx]

## Sheet: Sheet1
Stage at treatment	Treatment	Primer	Cp	Avg Cp	Std Dev	DCT	-DCT	gene expression
L5	L5 dsDnmt1	Of_DNMT1_rt5	29.8	29.9067	0.16773	9.91	-9.91	-5.10122
L5	L5 dsDnmt1	Of_DNMT1_rt5	29.1	29.11	0.1253	9.32667	-9.32667	-4.51789
L5	L5 dsDnmt1	Of_DNMT1_rt5	28.68	28.8367	0.184481	8.71333	-8.71333	-3.90455
L5	L5 dsDnmt1	Of_DNMT1_rt5	30.43	30.3333	0.193993	8.59667	-8.59667	-3.78789
L5	L5 dsDnmt1	Of_DNMT1_rt5	27.89	27.92	0.0519615	8.12667	-8.12667	-3.31789
L5	L5 dsDnmt1	Of_DNMT1_rt5	27.52	27.5833	0.070946	7.98667	-7.98667	-3.17789
L5	L5 dsDnmt1	Of_DNMT1_rt5	27.24	27.2733	0.0493288	7.68	-7.68	-2.87122
L5	L5 dsDnmt1	Of_DNMT1_rt5	28.08	28.0367	0.0378594	7.57	-7.57	-2.76122
L5	L5 dsDnmt1	Of_DNMT1_rt5	28.03	28.06	0.07	7.54	-7.54	-2.73122
L5	L5 dsDnmt1	Of_DNMT1_rt5	27.17	27.1633	0.0404145	7.41	-7.41	-2.60122
L5	L5 dsDnmt1	Of_DNMT1_rt5	27.66	27.6333	0.0251661	7.39333	-7.39333	-2.58455
L5	L5 dsDnmt1	Of_DNMT1_rt5	28.07	28.03	0.052915	7.13333	-7.13333	-2.32455
L5	L5 dsDnmt1	Of_DNMT1_rt5	27.74	27.7667	0.046188	6.78333	-6.78333	-1.97455
L5	L5 dsDnmt1	Of_DNMT1_rt5	26.88	26.8267	0.0680686	6.44333	-6.44333	-1.63455
L5	L5 dsDnmt1	Of_DNMT1_rt5	26.46	26.4433	0.0152753	5.61667	-5.61667	-0.807887
L5	L5 dsDnmt1	Of_DNMT1_rt5	24.9671	24.9766	0.0859717	3.69933	-3.69933	1.10945
L5	L5 dsRED	Of_DNMT1_rt5	27.44	27.3433	0.150444	5.69	-5.69	-0.88122
L5	L5 dsRED	Of_DNMT1_rt5	25.45	25.4933	0.0585947	5.42667	-5.42667	-0.617887
L5	L5 dsRED	Of_DNMT1_rt5	25.16	25.1433	0.0568624	5.38	-5.38	-0.57122
L5	L5 dsRED	Of_DNMT1_rt5	25.28	25.3533	0.080829	5.15	-5.15	-0.34122
L5	L5 dsRED	Of_DNMT1_rt5	26.22	26.3033	0.170978	5.02333	-5.02333	-0.214553
L5	L5 dsRED	Of_DNMT1_rt5	25.98	25.99	0.0264575	4.89667	-4.89667	-0.0878867
L5	L5 dsRED	Of_DNMT1_rt5	25.72	25.8933	0.300222	4.65	-4.65	0.15878
L5	L5 dsRED	Of_DNMT1_rt5	25.64	25.5867	0.0680686	4.61333	-4.61333	0.195447
L5	L5 dsRED	Of_DNMT1_rt5	25.76	25.72	0.0458258	4.58333	-4.58333	0.225447
L5	L5 dsRED	Of_DNMT1_rt5	25.88	25.9367	0.125033	3.84667	-3.84667	0.962113
L3	L3 dsDnmt1	Of_DNMT1_rt5	28.96	29.11	0.136137	7.3	-7.29667	-1.67556
L3	L3 dsDnmt1	Of_DNMT1_rt5	28.82	28.85	0.151767	7.33	-7.33333	-1.71222
L3	L3 dsDnmt1	Of_DNMT1_rt5	29.02	28.9	0.10583	7.09	-7.09	-1.46889
L3	L3 dsDnmt1	Of_DNMT1_rt5	29.57	29.53	0.051316	6.94	-6.93667	-1.31556
L3	L3 dsDnmt1	Of_DNMT1_rt5	29.71	29.64	0.080829	7.22	-7.22	-1.59889
L3	L3 dsDnmt1	Of_DNMT1_rt5	28.52	28.62	0.0873689	6.38	-6.38	-0.758889
L3	L3 dsDnmt1	Of_DNMT1_rt5	27.6	27.63	0.0416333	6.51	-6.50667	-0.885556
L3	L3 dsDnmt1	Of_DNMT1_rt5	29.67	29.89	0.188237	8.08	-8.08333	-2.46222
L3	L3 dsDnmt1	Of_DNMT1_rt5	30.1	29.98	0.136504	7.6	-7.6	-1.97889
L3	L3 dsDnmt1	Of_DNMT1_rt5	30.7	30.43	0.316439	7.8	-7.8	-2.17889
L3	L3 dsDnmt1	Of_DNMT1_rt5	30.05	30.04	0.061101	7.66	-7.65667	-2.03556
L3	L3 dsDnmt1	Of_DNMT1_rt5	30.14	29.9	0.21	8.21	-8.20667	-2.58556
L3	L3 dsDnmt1	Of_DNMT1_rt5	29.62	29.47	0.140475	7.77	-7.77333	-2.15222
L3	L3 dsDnmt1	Of_DNMT1_rt5	30.92	31.03	0.159478	7.78	-7.78333	-2.16222
L3	L3 dsDnmt1	Of_DNMT1_rt5	30.65	30.73	0.070946	8.98	-8.97667	-3.35556
L3	L3 dsRED	Of_DNMT1_rt5	27.22	27.24	0.0173205	5.14	-5.14	0.481111
L3	L3 dsRED	Of_DNMT1_rt5	27	27.03	0.0519615	4.59	-4.59	1.03111
L3	L3 dsRED	Of_DNMT1_rt5	27.11	27.03	0.08	4.48	-4.48333	1.13778
L3	L3 dsRED	Of_DNMT1_rt5	27.27	27.4	0.122202	5.3	-5.29667	0.324444
L3	L3 dsRED	Of_DNMT1_rt5	27.21	27.23	0.0665833	5.29	-5.29333	0.327778
L3	L3 dsRED	Of_DNMT1_rt5	26.27	26.41	0.126623	5.42	-5.41667	0.204444
L3	L3 dsRED	Of_DNMT1_rt5	26.7	26.67	0.0305505	5.48	-5.47667	0.144444
L3	L3 dsRED	Of_DNMT1_rt5	27.73	27.76	0.0493288	5.97	-5.97333	-0.352222
L3	L3 dsRED	Of_DNMT1_rt5	26.57	26.53	0.0665833	5.63	-5.62667	-0.00555567
L3	L3 dsRED	Of_DNMT1_rt5	27.63	27.62	0.023094	6.02	-6.02	-0.398889
L3	L3 dsRED	Of_DNMT1_rt5	27.12	27.09	0.0378594	6.04	-6.03667	-0.415556
L3	L3 dsRED	Of_DNMT1_rt5	26.88	26.84	0.0665833	5.69	-5.68667	-0.0655557
L3	L3 dsRED	Of_DNMT1_rt5	27.8	27.77	0.0288675	5.92	-5.91667	-0.295556
L3	L3 dsRED	Of_DNMT1_rt5	27.6	27.56	0.0472582	6.34	-6.34	-0.718889
L3	L3 dsRED	Of_DNMT1_rt5	27.74	27.8	0.052915	6.03	-6.02667	-0.405556
L3	L3 dsRED	Of_DNMT1_rt5	27.17	27.3	0.141892	6.39	-6.38667	-0.765556
L3	L3 dsRED	Of_DNMT1_rt5	27.53	27.54	0.0208167	5.69	-5.69333	-0.0722223
L3	L3 dsRED	Of_DNMT1_rt5	26.75	26.79	0.0723418	5.78	-5.77667	-0.155556
