# Supplementary material for: The essential role of Dnmt1 in gametogenesis in the large milkweed bug Oncopeltus fasciatus
Source: eLife. 2021 Apr 12;10:e62202. doi: 10.7554/eLife.62202 (PMC8064748; doi:10.7554/eLife.62202)
Supplement: Figure 5—source data 1. [file elife-62202-fig5-data1.xlsx]

## Sheet: Testis Areas
Stage of Injection	Area (mm²)	Treatment
L3	1.82114	L3 dsRED
L3	2.21488	L3 dsRED
L3	2.25006	L3 dsRED
L3	1.66291	L3 dsRED
L3	1.9835	L3 dsRED
L3	1.89261	L3 dsRED
L3	1.90301	L3 dsRED
L3	1.37684	L3 dsRED
L3	2.04495	L3 dsRED
L3	2.10042	L3 dsRED
L3	1.83197	L3 dsRED
L3	0.702	L3 dsDNMT1
L3	1.274	L3 dsDNMT1
L3	0.853	L3 dsDNMT1
L3	1.0681	L3 dsDNMT1
L3	1.25163	L3 dsDNMT1
L3	1.27262	L3 dsDNMT1
L3	1.12542	L3 dsDNMT1
L3	1.06327	L3 dsDNMT1
L3	1.00783	L3 dsDNMT1
L3	1.04256	L3 dsDNMT1
L3	0.861742	L3 dsDNMT1
L3	1.56973	L3 dsBoule
L3	1.9881	L3 dsBoule
L3	1.89472	L3 dsBoule
L3	1.39656	L3 dsBoule
L3	1.48434	L3 dsBoule
L3	1.71826	L3 dsBoule
L3	1.6405	L3 dsBoule
L3	1.777	L3 dsBoule
L3	1.49607	L3 dsBoule
L3	1.51902	L3 dsBoule
L3	1.73109	L3 dsBoule
L5	1.43844	L5 dsRED
L5	1.80939	L5 dsRED
L5	1.63801	L5 dsRED
L5	1.93619	L5 dsRED
L5	1.56986	L5 dsRED
L5	1.56349	L5 dsRED
L5	1.55092	L5 dsRED
L5	1.72976	L5 dsRED
L5	1.75768	L5 dsRED
L5	1.932	L5 dsRED
L5	1.68198	L5 dsRED
L5	1.89634	L5 dsRED
L5	1.50872	L5 dsRED
L5	1.74863	L5 dsDNMT1
L5	1.74198	L5 dsDNMT1
L5	1.71537	L5 dsDNMT1
L5	1.78002	L5 dsDNMT1
L5	2.0945	L5 dsDNMT1
L5	1.79848	L5 dsDNMT1
L5	1.96228	L5 dsDNMT1
L5	2.15848	L5 dsDNMT1
L5	1.75132	L5 dsDNMT1
L5	1.74883	L5 dsDNMT1
L5	2.29769	L5 dsDNMT1
L5	1.63814	L5 dsDNMT1
L5	1.82748	L5 dsDNMT1
L5	1.705	L5 dsBoule
L5	1.836	L5 dsBoule
L5	1.627	L5 dsBoule
L5	1.397	L5 dsBoule
L5	1.602	L5 dsBoule
L5	1.686	L5 dsBoule
L5	1.568	L5 dsBoule
L5	1.703	L5 dsBoule
L5	1.883	L5 dsBoule
L5	1.801	L5 dsBoule
L5	1.34	L5 dsBoule
L5	1.532	L5 dsBoule
L5	1.636	L5 dsBoule
L5	1.513	L5 dsBoule
L5	1.65	L5 dsBoule
L5	1.614	L5 dsBoule
none	1.697	untreated
none	2.072	untreated
none	1.445	untreated
none	1.925	untreated
none	0.98	untreated
none	1.997	untreated
none	2.123	untreated
none	1.881	untreated
none	1.18	untreated
none	2.175	untreated
none	2.069	untreated
none	2.02	untreated
none	1.923	untreated
none	2.108	untreated
none	1.145	untreated
