# Supplementary material for: The essential role of Dnmt1 in gametogenesis in the large milkweed bug Oncopeltus fasciatus
Source: eLife. 2021 Apr 12;10:e62202. doi: 10.7554/eLife.62202 (PMC8064748; doi:10.7554/eLife.62202)
Supplement: Figure 7—source data 1. [file elife-62202-fig7-data1.xlsx]

## Sheet: KC sperm limit data
Testis Area (mm²)	ID-photo	ID-fertility	Treatment	collection low fert	collection NO fert	1st week no hatching
1.29082205398535	k1	k1	control	5	10	5
1.09365638324577	k10	k10	dnmt	7	7	3.5
1.53977506889132	k19	k19	control	7	7	3.5
1.23148836132752	k2	k2	control	5	11	5.5
1.73688917769772	k21	k21	control	10	11	5.5
1.25524240353201	k24	k24	dnmt
1.55779823920082	k25	k25	dnmt	5	5	2.5
1.51866589613512	k3	k3	control	2	2	1
1.26906454935957	k30	k30	dnmt	3
2.02243314397381	k31	k31	control	6	7	3.5
1.77306504767161	k32	k32	control	6	9	4.5
1.71964393807204	k33	k33	control	10	16	8
1.79972395028499	k34	k34	control	11
1.96942681950877	k35	k35	control	7	13	6.5
1.44390224920059	k37	k37	dnmt	7	7	3.5
1.30666687312808	k38	k38	dnmt	5	6	3
1.71432756108969	k39	k39	dnmt	4	5	2.5
1.35614620109343	k4	k4	control	8	9	4.5
1.27126879182741	k51	k51	dnmt	5	6	3
1.5400086567413	k52	k52	dnmt
1.23128060794884	k53	k53	dnmt
1.36522280394473	k54	k54	dnmt	2	7	3.5
1.63144691652992	k55	k55	dnmt	6	8	4
1.45850241692235	k56	k56	control	9	10	5
1.35575738280599	k58	k58	control	5	7	3.5
1.76730796595617	k59	k59	control	9	10	5
1.22360464507234	k6	k6	dnmt	3	5	2.5
1.57952972189387	k60	k60	control	8
1.49042549620116	k62	k62	control	5	5	2.5
1.8870906801765	k63	k63	control	3	6	3
1.96032450127183	k64	k64	control	5	8	4
1.66666332209112	k65	k65	control	10	11	5.5
1.31825868076267	k67	k67	dnmt	8	9	4.5
1.13494113398567	k68	k68	dnmt	2	2	1
1.79080302019146	k69	k69	dnmt	6
1.30026150447757	k70	k70	dnmt	5	8	4
1.53759676324246	k72	k72	control	9	9	4.5
2.0587646461606	k73	k73	control	12	14	7
1.78452733030426	k74	k74	control
1.8508626476336	k75	k75	control	7	10	5
1.458969075769	k76	k76	dnmt	2	2	1
1.15869529194894	k77	k77	dnmt	6	7	3.5
		k78	dnmt	2	2	1
1.29626791132346	k79	k79	dnmt	7	7	3.5
1.2341851502139	k8	k8	dnmt	5	5	2.5
1.47831488290943	k80	k80	dnmt	10
1.65237462164273	k81	k81	control	10
1.84235711870001	k82	k82	control	14
2.12559301574187	k83	k83	control	10
1.42354505530177	k84	k84	control	14
1.97230537355782	k85	k85	control	10	12	6
1.50914888361192	k87	k87	dnmt	12
1.3783447237974	k89	k89	dnmt	7	9	4.5
1.27827079516129	k9	k9	dnmt	5	8	4
		k90	dnmt	4	5	2.5
